# Supplementary material for: Smartphone Applications for Encouraging Asthma Self-Management in Adolescents: A Systematic Review
Source: MDPI journal article supplement (doi:10.3390/ijerph15112403), 2018-10-29
Supplement: s1 [file s1]

**Table S1.** Quality assessment.

| Study Assessment Question                                                                | <i>Burbank et al.</i><br>[22] | <i>Carpenter et al.</i><br>[25] | <i>Koster et al.</i><br>[29] | <i>Odom et al.</i><br>[28] | <i>Panzer et al.</i><br>[30] | <i>Roberts et al.</i><br>[26] | <i>Schneider et al.</i><br>[27] |
|------------------------------------------------------------------------------------------|-------------------------------|---------------------------------|------------------------------|----------------------------|------------------------------|-------------------------------|---------------------------------|
| 1. Is the research question clearly stated?                                              | Yes                           | Yes                             | Yes                          | Yes                        | Yes                          | Yes                           | Yes                             |
| 2. Are the criteria for selecting the sample clearly defined?                            | Yes                           | Yes                             | Yes                          | Yes                        | Yes                          | Yes                           | Yes                             |
| 3. Is the method of recruitment clear?                                                   | Yes                           | Yes                             | Yes                          | Yes                        | Yes                          | Yes                           | Yes                             |
| 4. Are the characteristics of the sample adequately defined?                             | Yes                           | Yes                             | Yes                          | Yes                        | Yes                          | Yes                           | Yes                             |
| 5. Is the final sample adequate and appropriate?                                         | Yes                           | Yes                             | No                           | No                         | Yes                          | Yes                           | Yes                             |
| 6. Was the method for collecting data adequately described?                              | Yes                           | Yes                             | Yes                          | Yes                        | Yes                          | Yes                           | Yes                             |
| 7. Was the data collected systematically?                                                | Yes,                          | Yes                             | Yes                          | Yes                        | Yes                          | Yes                           | Yes                             |
| 8. Was the relationship between the researcher and the participant explicit?             | Yes                           | Yes                             | Yes                          | Yes                        | Yes                          | Yes                           | Yes                             |
| 9. Were the methods used in the data analysis appropriate and designed to minimize bias? | Yes                           | Yes                             | Yes                          | Yes                        | Yes                          | Yes                           | Yes                             |
| 10. Is evidence provided in support of the analysis?                                     | Yes.                          | Yes                             | Yes                          | Yes                        | Yes                          | Yes                           | Yes                             |
| 11. Is there evidence of efforts to establish validity?                                  | No                            | No                              | No                           | No                         | No                           | Yes                           | No                              |
| 12. Were the conclusions drawn appropriate given the results?                            | Yes                           | Yes                             | Yes                          | Yes                        | Yes                          | Yes                           | Yes                             |
